# Supplementary material for: C/EBPβ-LAP*/LAP Expression Is Mediated by RSK/eIF4B-Dependent Signalling and Boosted by Increased Protein Stability in Models of Monocytic Differentiation
Source: PubMed Central journal article supplement (PMC4672875; doi:10.1371/journal.pone.0144338), 2015-12-08
Supplement: pone.0144338.s001.pdf [file pone.0144338.s001.pdf]

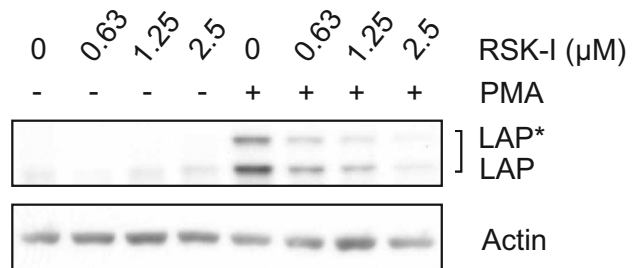

**S1 Figure. Determination of the effective dose of the applied RSK-I.** THP-1 cells were incubated for 24 h with PMA together with increasing doses of RSK-I. Subsequently, LAP\*/LAP protein amounts were assessed (n=3).
