# Supplementary material for: C/EBPβ-LAP*/LAP Expression Is Mediated by RSK/eIF4B-Dependent Signalling and Boosted by Increased Protein Stability in Models of Monocytic Differentiation
Source: PubMed Central journal article supplement (PMC4672875; doi:10.1371/journal.pone.0144338), 2015-12-08
Supplement: pone.0144338.s003.pdf [file pone.0144338.s003.pdf]

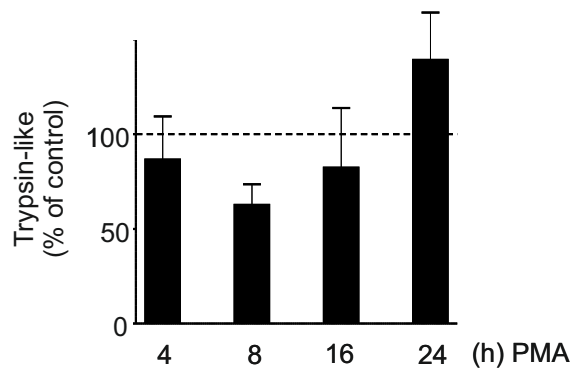

**S3 Figure. Trypsin-like proteolytic activity in differentiating THP-1 cells.**

THP-1 cells were treated with PMA up to 24 h and the trypsin-like activity of the proteasome was determined in whole cell extracts using protease-specific substrates (mean $\pm$ SD; n=3, duplicates).
